# Supplementary material for: Impacts of regular consumption of grapes on macular pigment accumulation in Singapore older adults: a randomized controlled trial
Source: Royal Society of Chemistry journal article supplement (doi:10.1039/d3fo02105j), 2023-01-01
Supplement: d3fo02105j1.xlsx [file d3fo02105j1.xlsx]

## Sheet: RAW DATA
Skin Carotenoids	Week 0																			Week 4																		Week 8
	A	27000	23500	34000	25000	55000	28000	38000	37000	29000	21500	14000	26500	53000	24000	20000				21000	23000	36500	28000	55000	33000	35000	34500	36500	22500	14000	24000	59000	22500	20500				27500	27500	42500	23500	54500	34500	36500	26000	34000	23500	21500	30500
	1	29500	47500	23500	41500	49500	28500	32000	40000	70500	37000	22000	21500	43000	23500	26000	29000	38500	49500	33000	49000	24000	42500	53500	29500	29000	35000	67500	31500	25000	21000	40500	28500	26000	31000	32500	49500	25500	47500	31000	40500	60000	27500	28500	38500	64500	31500	26500	18000
MPOD
	A	0.48	0.41	0.6	0.67	0.72	0.46	0.58	0.32	0.67	0.34	0.41	0.44	0.56						0.53	0.41	0.63	0.72	0.77	0.46	0.6	0.32	0.77	0.34	0.53	0.46	0.53						0.58	0.46	0.63	0.65	0.75	0.46	0.63	0.32	0.6	0.27	0.47	0.46
	1	0.65	0.65	0.7	0.64	0.77	0.46	0.46	0.63	0.29	0.36	0.51	0.48	0.51	0.75	0.32	0.65	0.72		0.62	0.75	0.75	0.72	0.7	0.48	0.43	0.77	0.27	0.36	0.51	0.51	0.58	0.66	0.29	0.76	0.75		0.65	0.67	0.63	0.7	0.82	0.53	0.41	0.67	0.29	0.36	0.53	0.51
Dietary Lutein
	A	400.983	313.837	5089.12	614.3	1155.01	766.593	286.343	983.267	10905.3	2122.95	8218.37	946.853	2310.97	577.257	634.937				515.953	895.167	1874.62	219.43	604.523	8324.91	839.597	3560.96	13114.1	345.257	1563.72	707.537	2346.02	1060.86	3898.47				1200.63	795.52	841.247	967.973	4292.73	2200.3	268.37	491.723	2661.21	4268.77	10668.6	622.727
	1	5620.6	2278.69	1115.56	842.863	1351.67	807.957	7742.14	1184.95	609.777	262.823	700.59	2674.76	7966.18	1177.2	787.037	563.98	554.973	5138.85	2086.06	5767.58	1088.31	2805.96	4007.5	263.513	604.533	5293.95	800.347	329.873	641.027	1451.27	3944.21	4891.34	472.083	146.31	1970.64	5486.06	437.12	2174.28	1082	1786.22	994.173	195.943	16505.6	1122.44	2047.67	2043.82	1203.67	585.837
Skin AGE
	A	3.2	2	1.5	1.1	2.9	3	3.4	3.1	2.6	2.5	0.9	1	3.5	3.3	3.1				2.6	1.7	2.9	3.1	2.7	2.8	3	2.8	2.4	3.7	2.5	2.8	3.2	3.6	2.1				2.6	1.8	3	3	2.7	2.4	2.8	2.7	2.5	3.5	2.3	2.8
	1	1.7	2.4	1.9	2.6	2.4	2.4	2.8	2.4	2.1	3.1	2.6	0.9	2.3	1.5	3.7	2.6	2.7	2.7	2.9	2.6	1.6	2.4	2	2.2	2.7	2.3	2.1	2.7	2.2	0.6	2.5	1.9	3.5	2.5	2.7	3.4	2.2	1.7	2	2.3	1.7	2	2.7	2.3	2.2	2.7	2.5	1.5
TAC
	A	0.1241	0.1154	0.2149	0.0953	0.2355	0.1443	0.2128	0.284	0.2768	0.3212	0.4485	0.0978	0.3774	0.2156	0.3538																						0.2912	0.1194	0.3035	0.1054	0.2152	0.0575	0.2138	0.3017	0.3357	0.3271	0.4241	0.217
	1	0.1114	0.0969	0.1458	0.313	0.3303	0.4454	0.168	0.1875	0.2763	0.2106	0.192	0.1948	0.1812	0.4589	0.3534	0.0973	0.362	0.4789																			0.1556	0.4115	0.1481	0.3472	0.3728	0.3611	0.3248	0.2432	0.2319	0.2287	0.1513	0.1386
Plasma Lutein
	A	510.53	968.62	1036.62	1109.79	1605.13	1268.44	1062.83	903.47	1196.15	664.05	683.97	618.38	652.31	592.93	493.07																						512.7	1169.04	878.48	610.04	1523.08	1065.33	1066.69	699.11	1205.87	671.92	1902.64	686.41
	1	633.33	657.99	593.33	793.23	1612.52	2032.06	823.78	1562.37	3057.48	619.65	595.8	591.1	639.26	386.82	636.09	479.36	715.62	352.51																			985.81	732.51	657.37	725.69	2607.65	1920.43	918.35	1699.89	1997.48	686.92	556.8	321.52
TPC	A	8.8457	8.6064	9.2713	10.3883	9.4043	8.3404	13.367	11.6117	14.6702	8.2872	10.0691	15.2553	12.4096	10.0691	8.7394																						10.8404	6.7447	8.8989	8.8723	7.1436	8.4202	19.1117	11.9043	10.8936	12.9415	10.6011	10.4947
	1	13.5	11.6383	12.8883	8.4734	8.6596	9.3777	10.6277	8.7128	10.6011	10.4415	12.0372	12.9415	8.8457	10.8936	13.0479	8.3936	10.2553	7.5957																			11.9309	11.1596	12.7287	11.0266	10.8138	8.2606	12.1968	8.1809	10.2553	13.367	9.6968	15.2287
	A=Control; 1=Intervention
[truncated: 42 more columns]
