# Supplementary material for: Impacts of regular consumption of grapes on macular pigment accumulation in Singapore older adults: a randomized controlled trial
Source: Royal Society of Chemistry journal article supplement (doi:10.1039/d3fo02105j), 2023-01-01
Supplement: d3fo02105j2.pdf [file d3fo02105j2.pdf]

### On-line Supplementary Material

“Impact of Regular Consumption of Grapes on Macular Pigment Accumulation in Singapore Older Adults: A Randomized Controlled Trial” by Weili Hu *et al.*

**Supplementary Table 1.** Nutritional Composition of FDGP/Control per packet

| <b>Nutrient</b>                           | <b>Amount/packet (46g)</b> |
|-------------------------------------------|----------------------------|
| Energy (kcal)                             | 170.66                     |
| Total Carbohydrate (g)                    | 40.76                      |
| Protein (g)                               | 1.65                       |
| Fat (g)                                   | 0.138                      |
| Vitamin A from carotene (IU) <sup>1</sup> | 97.52                      |
| Vitamin C (mg) <sup>1</sup>               | 2.7                        |
| <b>Carotenoids<sup>1</sup></b>            |                            |
| Lutein (μg)                               | 322.3                      |
| α-carotene (μg)                           | 103.7                      |
| β-carotene (μg)                           | 235.5                      |
| <b>Phenolic Compounds<sup>1</sup></b>     |                            |
| Catechin (μg)                             | 1304.6                     |
| Kaempferol (μg)                           | 47.4                       |
| Isorhamnetin (μg)                         | 48.7                       |
| Quercetin (μg)                            | 664.2                      |
| Taxifolin (μg)                            | 86.0                       |
| Resveratrol (μg)                          | 39.1                       |
| Anthocyanins (mg)                         | 13.6                       |

<sup>1</sup>Compounds only present in the FDGP

**Supplementary Table 2.** Macro/Micronutrients in habitual diet across 16-week study

|                                                               |         | Placebo      | Intervention | <i>P</i> |              |
|---------------------------------------------------------------|---------|--------------|--------------|----------|--------------|
|                                                               |         |              |              | Time     | Group x Time |
| <b>Energy<br/>(kcal/day)</b>                                  | Week 0  | 1674.5±115.4 | 1480.2±95.0  | 0.579    | 0.721        |
|                                                               | Week 4  | 1638.8±152.3 | 1565.9±89.8  |          |              |
|                                                               | Week 8  | 1630.4±146.3 | 1560.2±88.0  |          |              |
|                                                               | Week 12 | 1662.3±130.7 | 1627.6±112.7 |          |              |
|                                                               | Week 16 | 1543.3±125.2 | 1526.1±111.6 |          |              |
| <b>Total<br/>Carbohydrate<br/>(g/day)</b>                     | Week 0  | 65.1±8.0     | 52.2±7.3     | 0.139    | 0.978        |
|                                                               | Week 4  | 60.3±10.1    | 49.3±6.2     |          |              |
|                                                               | Week 8  | 61.8±9.7     | 51.6±5.6     |          |              |
|                                                               | Week 12 | 58.3±9.4     | 51.5±6.5     |          |              |
|                                                               | Week 16 | 54.1±5.8     | 40.3±5.3     |          |              |
| <b>Protein<br/>(g/day)</b>                                    | Week 0  | 76.1±7.7     | 65.1±4.4     | 0.909    | 0.358        |
|                                                               | Week 4  | 70.1±7.1     | 67.5±5.3     |          |              |
|                                                               | Week 8  | 71.1±7.1     | 73.9±6.4     |          |              |
|                                                               | Week 12 | 70.0±6.0     | 73.3±5.7     |          |              |
|                                                               | Week 16 | 71.9±6.3     | 69.0±5.7     |          |              |
| <b>Fat<br/>(g/day)</b>                                        | Week 0  | 62.4±5.0     | 56.7±4.2     | 0.328    | 0.797        |
|                                                               | Week 4  | 63.0±7.1     | 63.6±5.3     |          |              |
|                                                               | Week 8  | 59.7±7.7     | 59.0±4.8     |          |              |
|                                                               | Week 12 | 69.1±6.2     | 63.1±6.2     |          |              |
|                                                               | Week 16 | 59.5±6.1     | 60.2±6.2     |          |              |
| <b><math>\alpha</math>-carotene<br/>(<math>\mu</math>g/d)</b> | Week 0  | 608.5±153.2  | 541.8±202.4  | 0.396    | 0.357        |

|                                     |         |               |               |       |       |
|-------------------------------------|---------|---------------|---------------|-------|-------|
|                                     | Week 4  | 817.0±180.2   | 222.1±93.1    |       |       |
|                                     | Week 8  | 920.5±410.0   | 354.0±108.5   |       |       |
|                                     | Week 12 | 473.6±191.3   | 272.9±111.4   |       |       |
|                                     | Week 16 | 373.4±149.0   | 307.8±102.8   |       |       |
|                                     | Week 0  | 3067.7±729.6  | 2443.7±543.9  |       |       |
|                                     | Week 4  | 3824.2±676.0  | 3100.9±704.9  |       |       |
| <b><i>β</i>-carotene<br/>(μg/d)</b> | Week 8  | 3538.5±852.0  | 2831.3±522.3  | 0.487 | 0.694 |
|                                     | Week 12 | 4600.4±1808.7 | 2581.5±453.1  |       |       |
|                                     | Week 16 | 3389.9±927.4  | 2310.0±486.7  |       |       |
|                                     | Week 0  | 2355.1±828.8  | 2298.9±594.1  |       |       |
|                                     | Week 4  | 2658.1±922.15 | 2336.1±478.1  |       |       |
| <b>Lutein (μg/d)</b>                | Week 8  | 2495.3±735.2  | 2301.6±912.6  | 0.783 | 0.863 |
|                                     | Week 12 | 3679.6±2136.3 | 2287.9±565.4  |       |       |
|                                     | Week 16 | 2599.5±786.5  | 1386.01±334.5 |       |       |
|                                     | Week 0  | 549.1±94.2    | 581.4±126.0   |       |       |
|                                     | Week 4  | 576.8±89.4    | 603.2±103.8   |       |       |
| <b>Vitamin A<br/>(μg/d)</b>         | Week 8  | 559.4±104.9   | 468.4±53.1    | 0.907 | 0.572 |
|                                     | Week 12 | 645.0±167.6   | 496.0±69.6    |       |       |
|                                     | Week 16 | 631.1±138.5   | 453.7±78.6    |       |       |

Data were reported as mean ± SEM.

**Supplementary Table 3.** Change in MPOD across 16-week study

|                    |         | Placebo   | Intervention       | <i>P</i>     |              |
|--------------------|---------|-----------|--------------------|--------------|--------------|
|                    |         |           |                    | Time         | Group x Time |
|                    | Week 0  | 0.51±0.04 | 0.56±0.04          |              |              |
|                    | Week 4  | 0.54±0.05 | 0.58±0.04          |              |              |
| <b>MPOD (D.U.)</b> | Week 8  | 0.53±0.04 | 0.59±0.04          | <b>0.007</b> | 0.810        |
|                    | Week 12 | 0.53±0.04 | 0.58±0.04          |              |              |
|                    | Week 16 | 0.54±0.04 | <b>0.61±0.04**</b> |              |              |

Data were reported as mean ± SEM. \*Denotes for significant difference within group compared to baseline visit using one-way repeated measure ANOVA: Tukey's multiple comparisons test. \*P < 0.05, \*\*P < 0.01.

**Supplementary Table 4.** Change in plasma total antioxidant capacity and phenolic content cross 16-week study

|                                             |         | Placebo    | Intervention         | <i>P</i> |              |
|---------------------------------------------|---------|------------|----------------------|----------|--------------|
|                                             |         |            |                      | Time     | Group x Time |
| <b>Total Antioxidant Capacity (TEAC mM)</b> | Week 0  | 0.23±0.10  | 0.26±0.13            |          |              |
|                                             | Week 8  | 0.26±0.11  | 0.29±0.11            | 0.057    | 0.132        |
|                                             | Week 16 | 0.25±0.14  | <b>0.36±0.20**</b>   |          |              |
| <b>Total Phenolic Content (GAE mg/L)</b>    | Week 0  | 10.62±0.60 | 10.50±0.44           |          |              |
|                                             | Week 8  | 10.45±0.76 | 11.21±0.46           | 0.112    | <b>0.003</b> |
|                                             | Week 16 | 10.09±0.49 | <b>12.58±0.55***</b> |          |              |

Data were reported as mean ± SEM. \*Denotes for significant difference within group compared to baseline visit using one-way repeated measure ANOVA: Tukey's multiple comparisons test. \*P < 0.05, \*\*P < 0.01, \*\*\*P < 0.001.

**Supplementary Table 5.** Change in skin AGEs level cross 16-week study

|                  |         | Placebo           | Intervention | <i>P</i>     |              |
|------------------|---------|-------------------|--------------|--------------|--------------|
|                  |         |                   |              | Time         | Group x Time |
|                  | Week 0  | 2.47±0.24         | 2.38±0.15    |              |              |
|                  | Week 4  | 2.79±0.13         | 2.38±0.15    |              |              |
| <b>Skin AGEs</b> | Week 8  | 2.77±0.12         | 2.77±0.12    | <b>0.045</b> | 0.095        |
|                  | Week 12 | 2.67±0.11         | 2.39±0.12    |              |              |
|                  | Week 16 | <b>2.99±0.12*</b> | 2.42±0.11    |              |              |

Data were reported as mean ± SEM. \*Denotes for significant difference within group compared to baseline visit using one-way repeated measure ANOVA: Tukey's multiple comparisons test. \*P < 0.05.
